# Supplementary material for: Data-Driven Prediction and Design of bZIP Coiled-Coil Interactions
Source: PLOS journal article supplement (doi:10.1371/journal.pcbi.1004046), 2015-02-19
Supplement: S5 (10.1371/journal.pcbi.1004046.s005) [file journal.pcbi.1004046.s005]

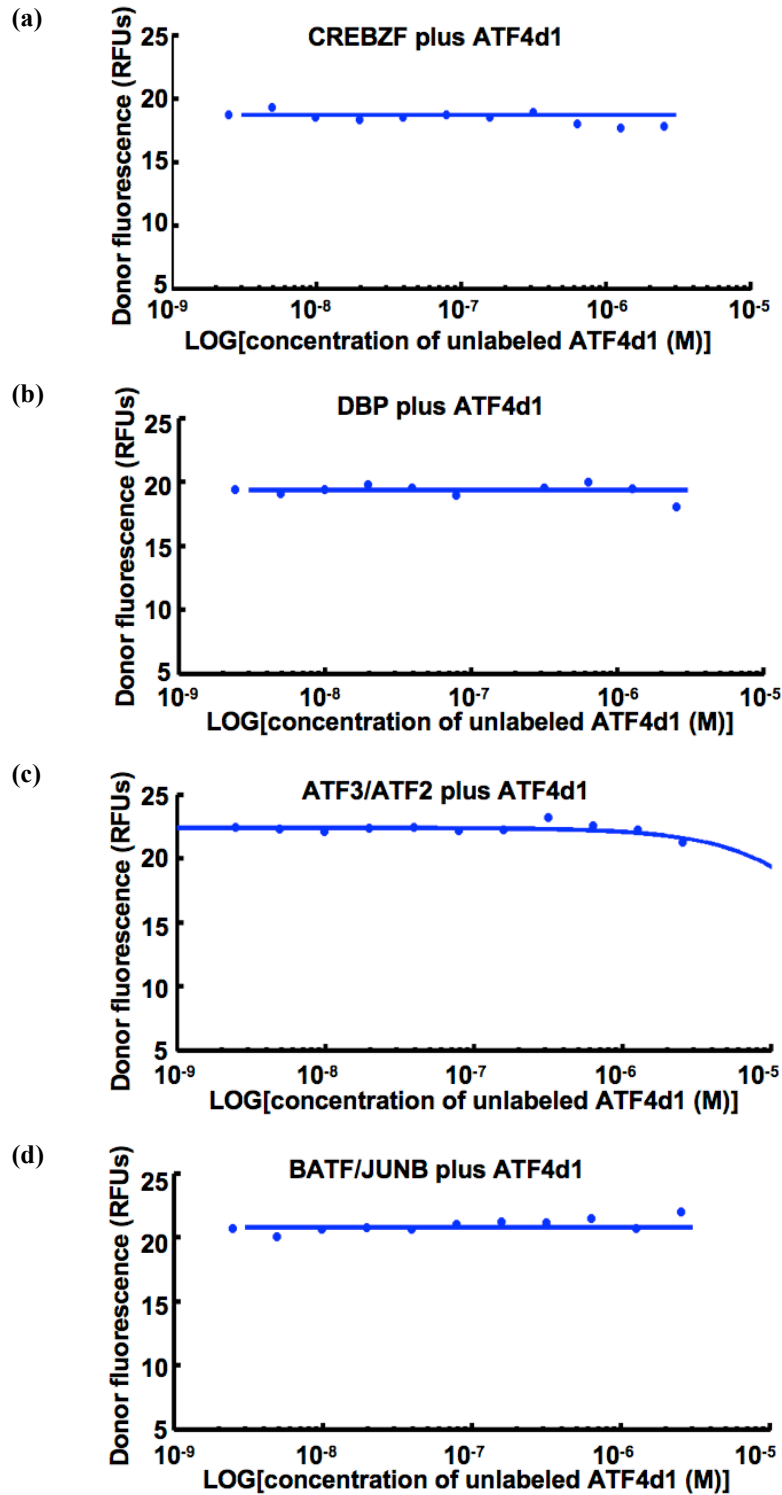

**Figure S5. ATF4-d1 does not inhibit FRET complexes formed by CREBZF, DBP, ATF2 or BATF bZIP coiled coils.**

Native bZIP coiled coils were labeled with fluorescein or TAMRA. In the coiled-coil heterodimer FRET complexes, the donor-labeled FRET partner was the candidate partner of ATF4-d1. (a) CREBZF homodimer (10 nM fluorescein labeled plus 50 nM TAMRA labeled) plus unlabeled ATF4-d1. (b) DBP homodimer (10 nM fluorescein labeled plus 50 nM TAMRA labeled) plus unlabeled ATF4-d1. (c) 10 nM of ATF3 with 40 nM ATF2 plus unlabeled ATF4-d1. (d) 10 nM of BATF with 40 nM JUNB plus unlabeled ATF4-d1.
